# Supplementary material for: Thrombomodulin Serum Levels—A Predictable Biomarker for the Acute Onset of Ischemic Stroke
Source: MDPI journal article supplement (doi:10.3390/cimb46010044), 2024-01-12
Supplement: s1 [file s1]

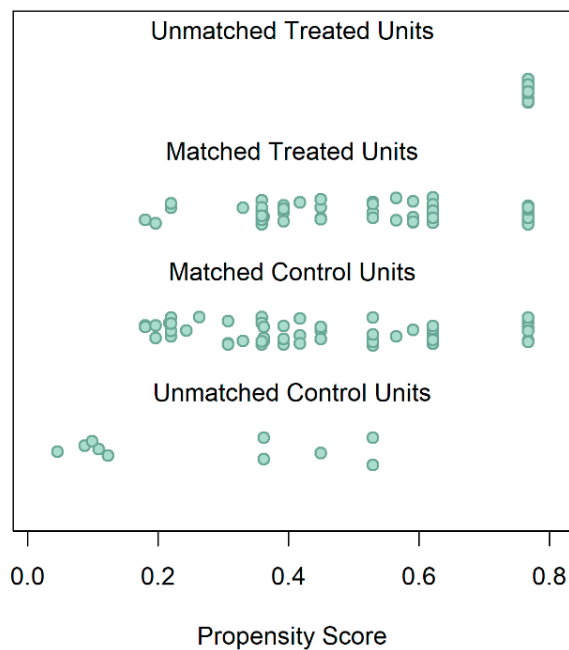

**Supplementary Figure S1.** Distribution of propensity scores. Patients were matched for the following variables: presence of diabetes, blood hypertension, chronic alcohol and tobacco use.

**Supplementary Table S1.** Demographic, clinical and pathological profiles of patients affected by acute stroke and non-affected counterparts after propensity score matching.

| Variable                           |                | Control group<br>N=58 | Stroke group<br>N=58 | Chi Square<br>p-value |
|------------------------------------|----------------|-----------------------|----------------------|-----------------------|
| <b>Age (years)</b> mean±sd         |                | 69.97±10.3            | 70.38±10.7           | 0.832                 |
| <b>Sex</b> N(%)                    | <b>Female</b>  | 24(41.38)             | 20(34.48)            | 0.444                 |
|                                    | <b>Male</b>    | 34(58.62)             | 38(65.52)            |                       |
| <b>Residential background</b> N(%) | <b>Urban</b>   | 29(50)                | 39(67.24)            | 0.059                 |
|                                    | <b>Rural</b>   | 29(50)                | 19(32.76)            |                       |
| <b>Atrial Fibrillation</b> N(%)    | <b>No</b>      | 44(75.86)             | 36(62.07)            | 0.108                 |
|                                    | <b>Yes</b>     | 14(24.14)             | 22(37.93)            |                       |
| <b>Dyslipidemia</b> N(%)           | <b>No</b>      | 29(50)                | 22(37.93)            | 0.19                  |
|                                    | <b>Yes</b>     | 29(50)                | 36(62.07)            |                       |
| <b>Diabetes</b> N(%)               | <b>No</b>      | 37(63.79)             | 43(74.14)            | 0.229                 |
|                                    | <b>Yes</b>     | 21(36.21)             | 15(25.86)            |                       |
| <b>Blood Hypertension</b> N(%)     | <b>grade 1</b> | 6(10.34)              | 5(8.62)              | 0.323                 |
|                                    | <b>grade 2</b> | 31(53.45)             | 24(41.38)            |                       |
|                                    | <b>grade 3</b> | 21(36.21)             | 29(50)               |                       |
| <b>Chronic Alcohol use</b> N(%)    | <b>No</b>      | 43(74.14)             | 48(82.76)            | 0.259                 |
|                                    | <b>Yes</b>     | 15(25.86)             | 10(17.24)            |                       |
| <b>Chronic Smoker</b> N(%)         | <b>No</b>      | 41(70.69)             | 48(82.76)            | 0.124                 |
|                                    | <b>Yes</b>     | 17(29.31)             | 10(17.24)            |                       |

**Supplementary Table S2.** Variation of TM levels at the first measurement (T1) in patients with stroke and in the control group.

| Variable                 |        | All cases   |                | Control group |                | Stroke group |                |
|--------------------------|--------|-------------|----------------|---------------|----------------|--------------|----------------|
|                          |        | mean±sd     | t-test p-value | mean±sd       | t-test p-value | mean±sd      | t-test p-value |
| Sex                      | Female | 11.72±10.22 | 0.126          | 3.8±1.88      | 0.511          | 20.53±8.25   | 0.053          |
|                          | Male   | 14.85±12.76 |                | 3.52±1.6      |                | 24.87±9.42   |                |
| Atrial Fibrillation N(%) | No     | 12.99±12.09 | 0.411          | 3.51±1.69     | 0.289          | 24.23±9.05   | 0.236          |
|                          | Yes    | 14.78±11.31 |                | 4.02±1.82     |                | 21.55±9.3    |                |
| Dyslipidemia N(%)        | No     | 10.95±9.74  | 0.021          | 3.65±1.86     | 0.963          | 20.14±7.57   | 0.026          |
|                          | Yes    | 15.63±12.96 |                | 3.63±1.6      |                | 25.12±9.64   |                |
| Diabetes N(%)            | No     | 14.57±11.89 | 0.132          | 3.39±1.73     | 0.134          | 22.9±8.98    | 0.608          |
|                          | Yes    | 11.26±11.54 |                | 4.03±1.66     |                | 24.28±10.1   |                |
| Chronic Alcohol use N(%) | No     | 14.54±12.1  | 0.071          | 3.72±1.76     | 0.586          | 23.01±9.71   | 0.685          |
|                          | Yes    | 10.19±10.36 |                | 3.47±1.65     |                | 24.3±5.02    |                |
| Chronic Smoker N(%)      | No     | 14.55±11.49 | 0.081          | 3.8±1.65      | 0.277          | 22.6±8.75    | 0.185          |
|                          | Yes    | 10.43±12.56 |                | 3.32±1.84     |                | 26.77±11.24  |                |

**Supplementary Table S3.** Variation of TM levels at the second measurement (T2) in patients with stroke.

| Variable                 |        | mean±sd     | t-test p-value |
|--------------------------|--------|-------------|----------------|
| Sex                      | Female | 19.82±6.53  | 0.01           |
|                          | Male   | 25.11±8.76  |                |
| Atrial Fibrillation N(%) | No     | 23.35±8.53  | 0.744          |
|                          | Yes    | 22.66±8.18  |                |
| Dyslipidemia N(%)        | No     | 21.29±7.09  | 0.162          |
|                          | Yes    | 24.21±8.93  |                |
| Diabetes N(%)            | No     | 22.69±8.29  | 0.463          |
|                          | Yes    | 24.5±8.66   |                |
| Chronic Alcohol use N(%) | No     | 22.97±8.79  | 0.783          |
|                          | Yes    | 23.77±5.3   |                |
| Chronic Smoker N(%)      | No     | 22.36±7.8   | 0.066          |
|                          | Yes    | 27.85±10.59 |                |

**Supplementary Table S4.** TM values analysis with the type of stroke

| Variable | mean±sd       |                  | t-test p-value |
|----------|---------------|------------------|----------------|
|          | Cardioembolic | Atherothrombotic |                |
| TM T1    | 21.55±9.3     | 24.23±9.05       | 0.236          |
| TM T2    | 22.66±8.18    | 23.35±8.53       | 0.744          |

**Supplementary Table S5.** Correlation of TM values at T<sub>1</sub> and T<sub>2</sub> with the biochemical parameters of the AIS patients. *R*: Pearson correlation coefficient.

| Biochemical parameter                    | TM T <sub>1</sub> |                  | TM T <sub>2</sub> |                  |
|------------------------------------------|-------------------|------------------|-------------------|------------------|
|                                          | R                 | p-value          | R                 | p-value          |
| LDL Cholesterol [mg/dl]                  | 0.365             | <b>0.002</b>     | 0.291             | <b>0.017</b>     |
| HDL Cholesterol [mg/dl]                  | 0.14              | 0.253            | 0.064             | 0.608            |
| Total Cholesterol [mg/dl]                | 0.333             | <b>0.006</b>     | 0.241             | <b>0.05</b>      |
| Triglycerides [mg/dl]                    | 0.075             | 0.544            | 0.031             | 0.805            |
| Total Lipids [mg/dl]                     | 0.255             | <b>0.036</b>     | 0.17              | 0.169            |
| Alanine aminotransferase (ALAT) [U/L]    | 0.415             | <b>&lt;0.001</b> | 0.377             | <b>0.002</b>     |
| Aspartate aminotransaminase (ASAT) [U/L] | 0.471             | <b>&lt;0.001</b> | 0.475             | <b>&lt;0.001</b> |
| Urea [mg/dl]                             | -0.114            | 0.345            | -0.006            | 0.961            |
| Creatinine [mg/dl]                       | -0.109            | 0.371            | 0.032             | 0.795            |
| Na [mmol/L]                              | -0.069            | 0.573            | -0.026            | 0.832            |
| Cl [mmol/L]                              | 0.166             | 0.169            | 0.166             | 0.176            |
| K [mmol/L]                               | -0.196            | 0.104            | -0.176            | 0.151            |
| AR [mmol/L]                              | -0.09             | 0.458            | -0.063            | 0.607            |

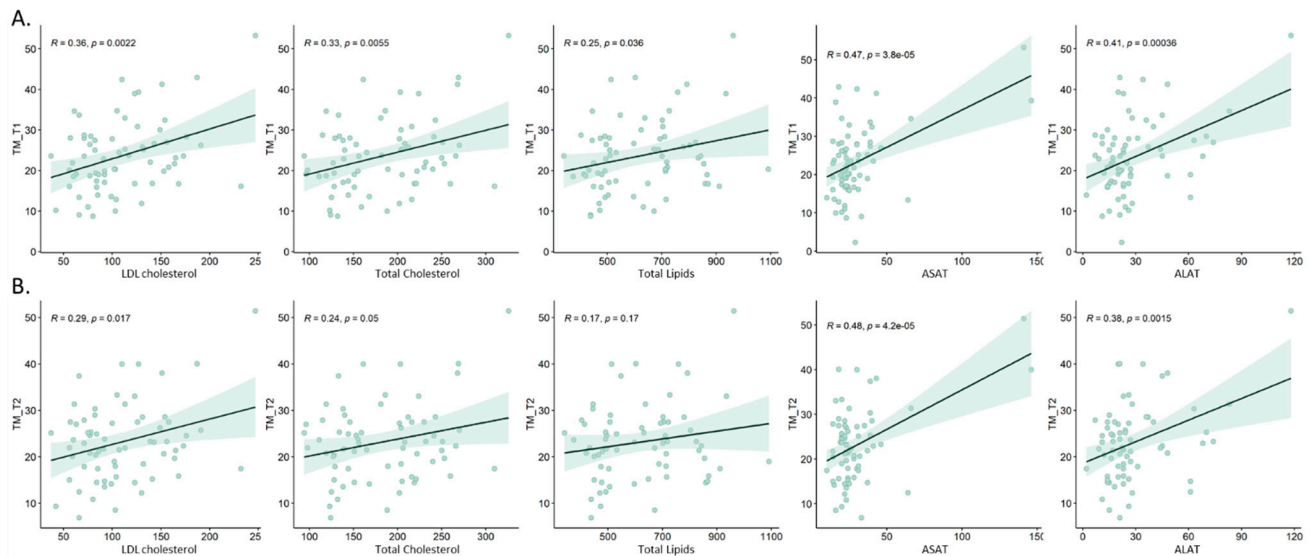

**Supplementary Figure S2.** Correlation plots of TM levels at T<sub>1</sub> (A) and at T<sub>2</sub> (B) with biochemical parameters in AIS patients. *R*: Pearson correlation coefficient.
